# Supplementary figures and images for: Stable liquid crystalline phases of colloidally dispersed exfoliated layered niobatesElectronic supplementary information (ESI) available: XRD patterns of the samples. See http://www.rsc.org/suppdata/cc/b3/b309628a/
Source: Royal Society of Chemistry journal article supplement (doi:10.1039/b309628a), 2003-12-19

Supplementary data


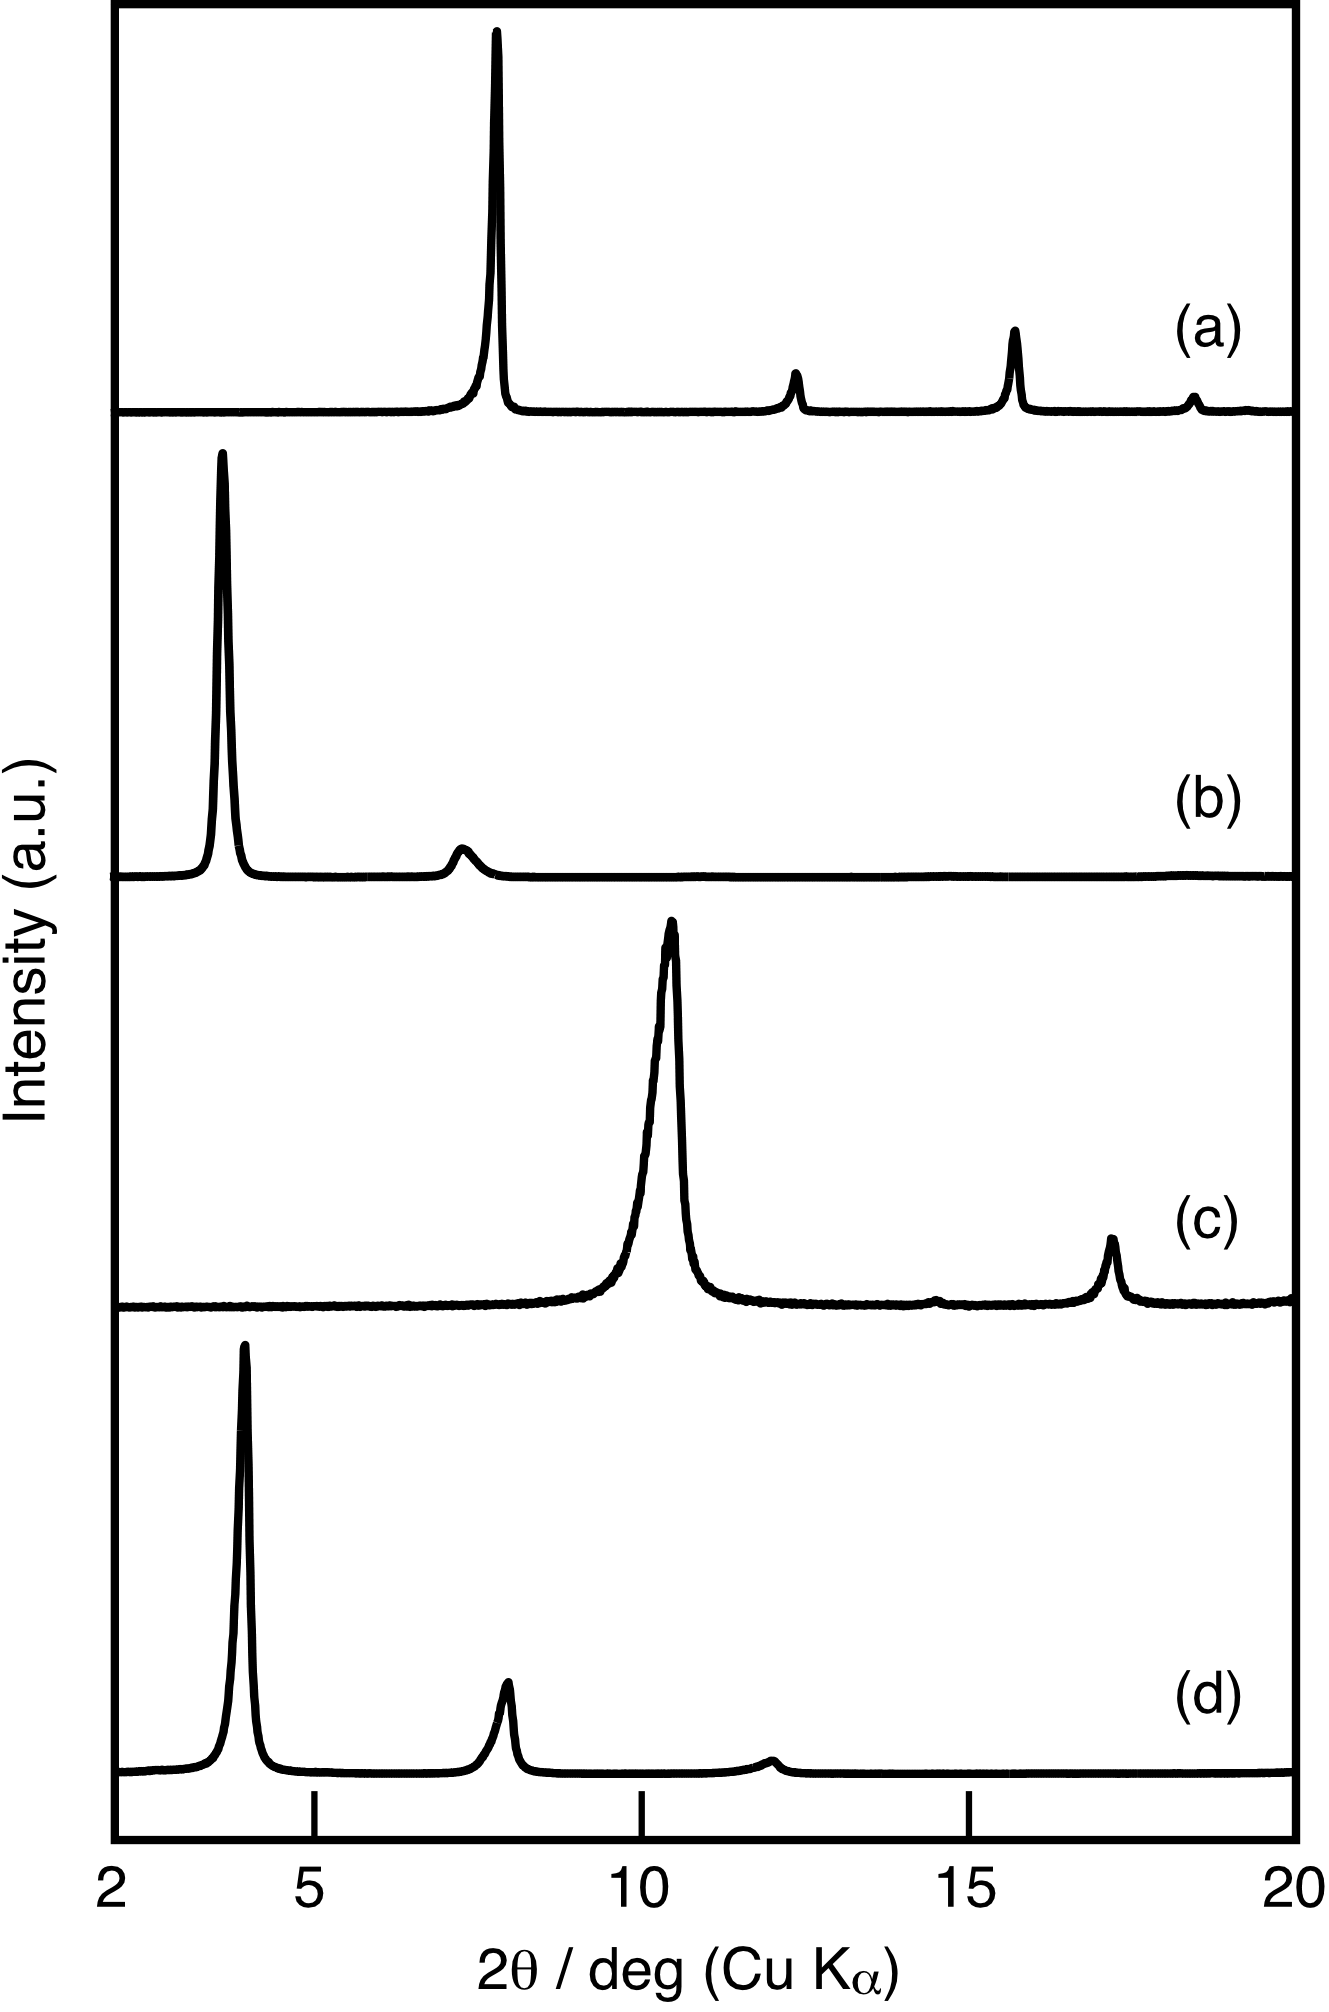


Fig. S1 XRD patterns of the samples.

Supplement: b309628a.doc [file b309628a.doc]
